# Supplementary material for: Elevated plasma sclerostin is associated with high brain amyloid-β load in cognitively normal older adults
Source: PubMed Central journal article supplement (PMC10477312; doi:10.1038/s41514-023-00114-4), 2023-09-04

## **Supplementary Content**

### **Supplementary Figures:**

**Supplementary Figure 1.** Spearman's analysis for the correlation of plasma sclerostin with NFL, GFAP, t-tau, p-tau181 and p-tau231, A $\beta$ 42, A $\beta$ 40 and A $\beta$ 42/A $\beta$ 40 in all participants.

**Supplementary Figure 2.** Spearman's analysis for the correlation of plasma sclerostin and SUVR.

**Supplementary Figure 1. Spearman's analysis for the correlation of plasma sclerostin with NFL, GFAP, t-tau, p-tau181 and p-tau231, A $\beta$ 42, A $\beta$ 40 and A $\beta$ 42/A $\beta$ 40 in all participants. Schematic representation of unadjusted correlation coefficients ( $\rho$ ) and  $P$  values between sclerostin and AD-related biomarkers were calculated using Spearman's correlation.**

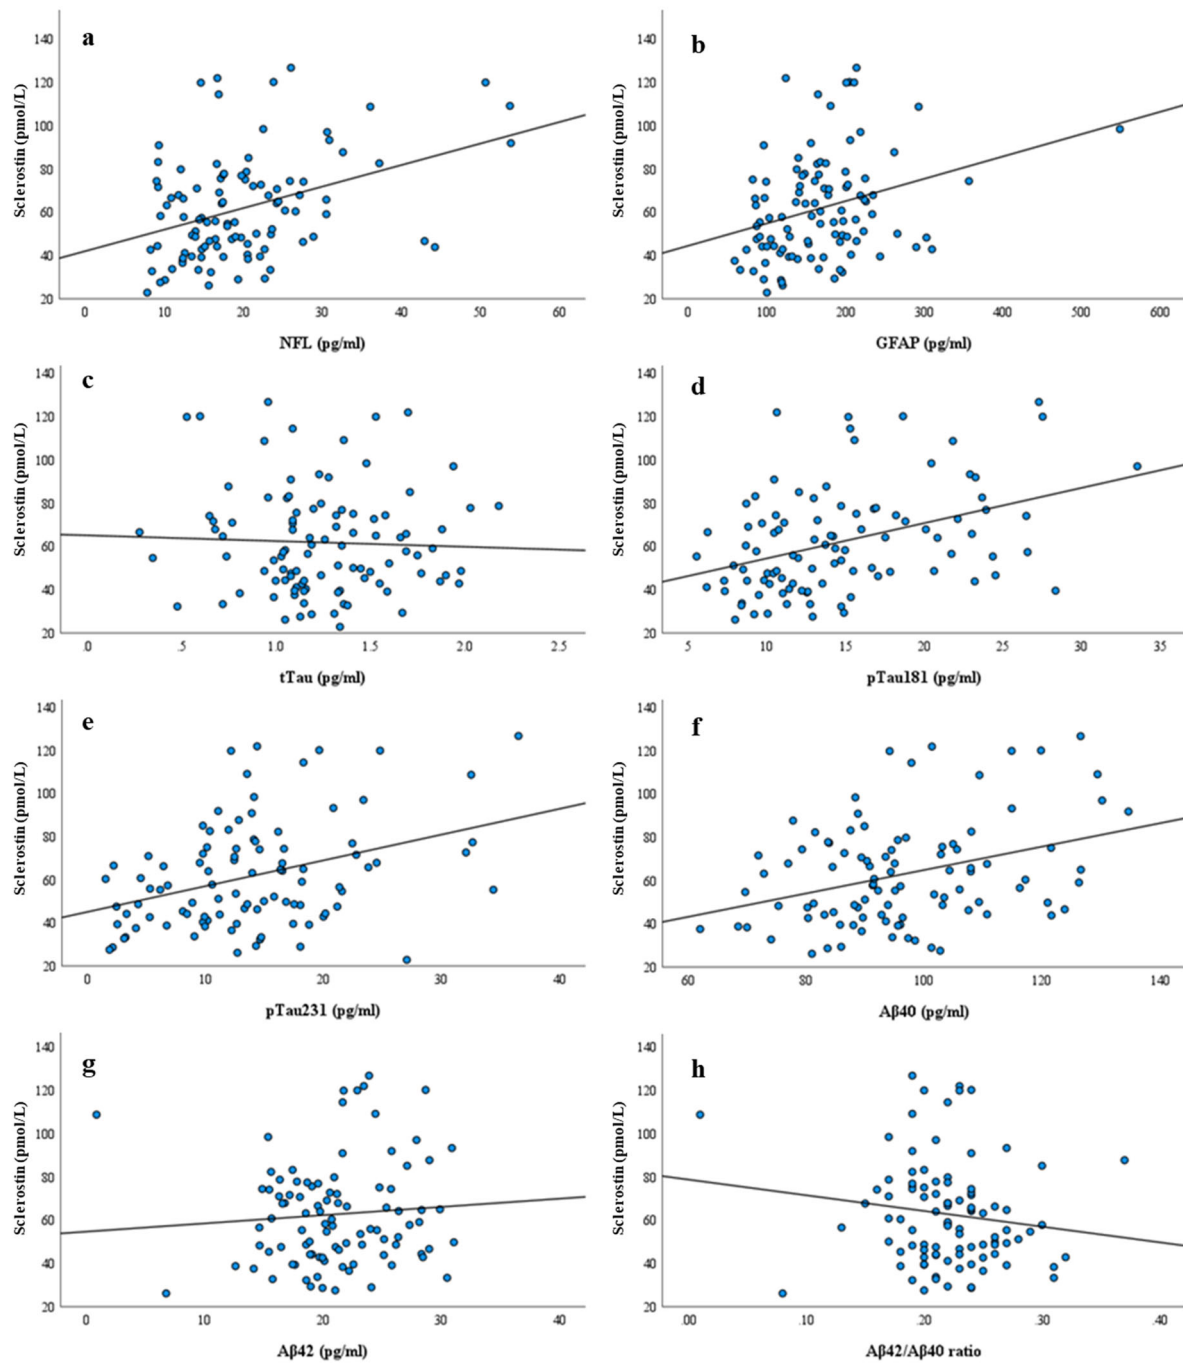

**Supplementary Figure 2. Association between plasma sclerostin and SUVR.** Correlation coefficients ( $\rho$ ) and  $P$  values were calculated using Spearman's correlation analysis. SUVR, standard uptake value ratio.

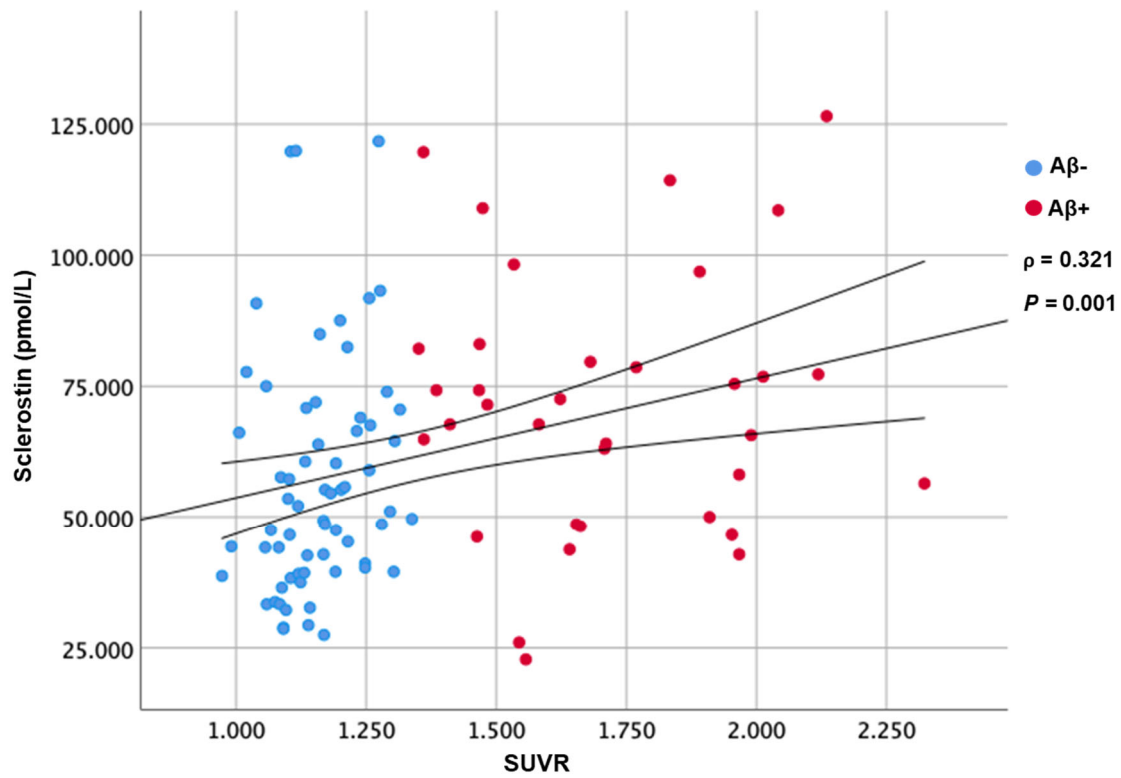

Supplement: 41514_2023_114_MOESM1_ESM.pdf [file 41514_2023_114_MOESM1_ESM.pdf]
